# Supplementary material for: On the performance of the Kohn–Sham orbital approach in the calculation of electron transfer parameters. The three state model
Source: Royal Society of Chemistry journal article supplement (doi:10.1039/c4cp02117g), 2014-01-01
Supplement: c4cp02117g1.pdf [file c4cp02117g1.pdf]

On the performance of the Kohn-Sham orbital approach in the calculation of  
electron transfer parameters. Three state model

C. Butchosa,<sup>§,¶</sup> S. Simon,<sup>§\*</sup> L. Blancafort,<sup>§</sup> A. A. Voityuk<sup>§,‡\*</sup>

<sup>§</sup>*Institut de Química Computacional i Catàlisi (IQCC) and Departament de Química, Universitat de Girona, Campus de Montilivi, 17071 Girona, Spain.* <sup>¶</sup>*Department of Chemistry, University College London, 20 Gordon Street, London WC1H 0AJ, United Kingdom.* <sup>‡</sup>*Institució Catalana de Recerca i Estudis Avançats (ICREA), Barcelona, Spain.*

\*To whom correspondence should be addressed. E-mail: [silvia.simon@udg.edu](mailto:silvia.simon@udg.edu) and [alexander.voityuk@icrea.cat](mailto:alexander.voityuk@icrea.cat)

**Fig. S1**  $\pi$ -stacked and T-shape structures considered in the paper.

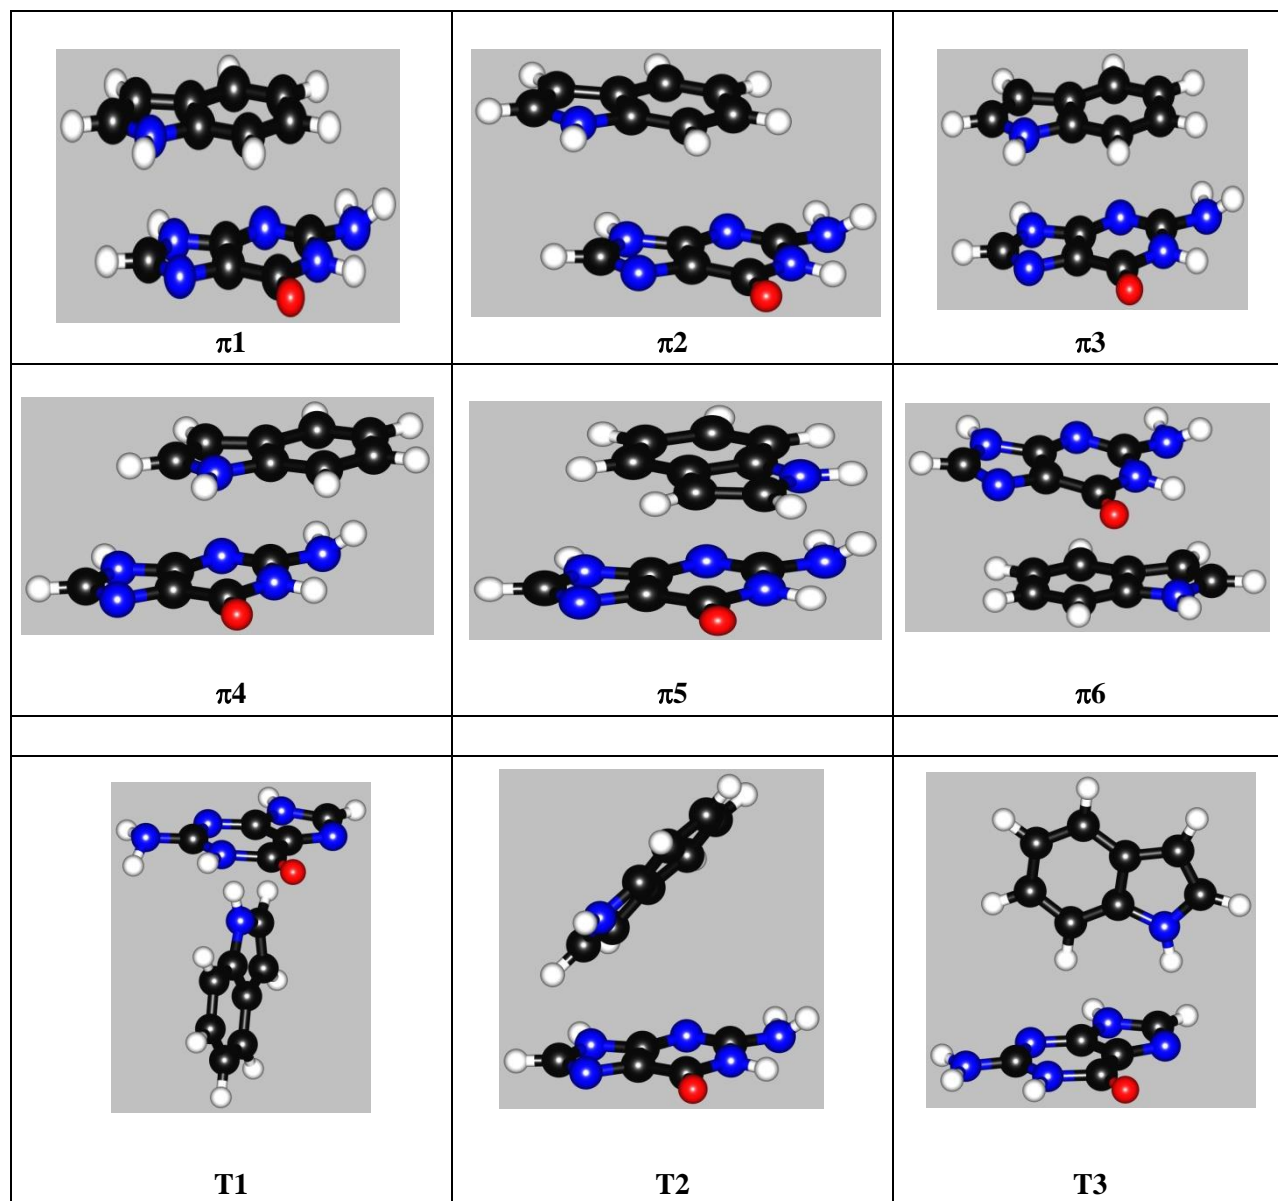

**Table S2** RMS deviation in eV (RMSD) between the orbital-based couplings and the MS-CASPT2 values and linear regression analysis for the 10 DFT functionals and HF data

| <b>Method</b>    | <b>Coupling</b>    | <b>RMSD</b> | <b>R<sup>2</sup></b> | <b>slope</b> | <b>y-intercept</b> |
|------------------|--------------------|-------------|----------------------|--------------|--------------------|
| <b>CAM-B3LYP</b> | V <sub>GS-CT</sub> | 0.0217      | 0.9549               | 1.1648       | -0.0146            |
|                  | V <sub>ES-CT</sub> | 0.0288      | 0.9304               | 0.8603       | -0.0034            |
| <b>wB97XD</b>    | V <sub>GS-CT</sub> | 0.0217      | 0.9553               | 1.1657       | -0.0148            |
|                  | V <sub>ES-CT</sub> | 0.0289      | 0.9292               | 0.8552       | -0.0027            |
| <b>M062X</b>     | V <sub>GS-CT</sub> | 0.0277      | 0.9546               | 1.1865       | -0.0148            |
|                  | V <sub>ES-CT</sub> | 0.0233      | 0.9294               | 0.8976       | -0.0051            |
| <b>LC-BLYP</b>   | V <sub>GS-CT</sub> | 0.0208      | 0.9582               | 1.2879       | -0.0132            |
|                  | V <sub>ES-CT</sub> | 0.0336      | 0.9537               | 0.9844       | -0.0054            |
| <b>LC-wPBE</b>   | V <sub>GS-CT</sub> | 0.0286      | 0.9497               | 1.2417       | -0.0161            |
|                  | V <sub>ES-CT</sub> | 0.0259      | 0.9337               | 0.9084       | -0.0036            |
| <b>PBE0</b>      | V <sub>GS-CT</sub> | 0.0194      | 0.9513               | 1.0716       | -0.0155            |
|                  | V <sub>ES-CT</sub> | 0.0361      | 0.9114               | 0.7806       | -0.0029            |
| <b>B3LYP</b>     | V <sub>GS-CT</sub> | 0.0205      | 0.9484               | 1.0479       | -0.0157            |
|                  | V <sub>ES-CT</sub> | 0.0383      | 0.9054               | 0.7543       | -0.0022            |
| <b>M06L</b>      | V <sub>GS-CT</sub> | 0.0269      | 0.9422               | 0.9591       | -0.0163            |
|                  | V <sub>ES-CT</sub> | 0.0437      | 0.9016               | 0.6953       | -0.0023            |
| <b>HF</b>        | V <sub>GS-CT</sub> | 0.0479      | 0.9492               | 1.2441       | 0.0127             |
|                  | V <sub>ES-CT</sub> | 0.0306      | 0.9756               | 1.1894       | 0.0035             |
| <b>BP86</b>      | V <sub>GS-CT</sub> | 0.0298      | 0.9228               | 0.9711       | -0.0189            |
|                  | V <sub>ES-CT</sub> | 0.0489      | 0.8420               | 0.6353       | 0.0031             |
| <b>BLYP</b>      | V <sub>GS-CT</sub> | 0.0303      | 0.9235               | 0.9592       | -0.0184            |
|                  | V <sub>ES-CT</sub> | 0.0496      | 0.8451               | 0.6275       | 0.0028             |

**Table S3** – Calculated ET parameters (diabatic free energies and couplings) for the  $\pi_1$  conformer different methods. (eV)

| <b>Method</b> | <b>Ect-Egs</b> | <b>Ees-Ect</b> | <b>Ees-Egs</b> | <b>Vgs-ct</b> | <b>Vct-es</b> |
|---------------|----------------|----------------|----------------|---------------|---------------|
| CASPT2        | 0.1690         | 0.3311         | 0.5000         | 0.0666        | 0.3006        |
| HF            | 0.2560         | 0.2830         | 0.5390         | 0.1307        | 0.3603        |
| BP86          | 0.0460         | 0.4340         | 0.4800         | 0.0026        | 0.2226        |
| BLYP          | 0.0670         | 0.4080         | 0.4750         | 0.0032        | 0.2191        |
| B3LYP         | 0.0930         | 0.3920         | 0.4850         | 0.0182        | 0.2491        |
| PBE0          | 0.0660         | 0.4270         | 0.4930         | 0.0208        | 0.2564        |
| M06L          | 0.0560         | 0.4130         | 0.4690         | 0.0114        | 0.2312        |
| M062X         | 0.1060         | 0.4120         | 0.5180         | 0.0275        | 0.2899        |
| LC-BLYP       | 0.1440         | 0.3720         | 0.5160         | 0.0387        | 0.3115        |
| CAM-B3LYP     | 0.1020         | 0.4040         | 0.5060         | 0.0281        | 0.2784        |
| wB97XD        | 0.0830         | 0.4300         | 0.5130         | 0.0282        | 0.2776        |
| LC-wPBE       | 0.0700         | 0.4490         | 0.5190         | 0.0279        | 0.2935        |

**Table S4** – Calculated ET parameters (diabatic free energies and couplings) for the  $\pi_2$  conformer different methods. (eV)

| <b>Method</b> | <b>Ect-Egs</b> | <b>Ees-Ect</b> | <b>Ees-Egs</b> | <b>Vgs-ct</b> | <b>Vct-es</b> |
|---------------|----------------|----------------|----------------|---------------|---------------|
| CASPT2        | 0.3447         | 0.0559         | 0.4006         | 0.2280        | 0.1466        |
| HF            | 0.4860         | 0.0300         | 0.5160         | 0.2846        | 0.1924        |
| BP86          | 0.2320         | 0.2190         | 0.4510         | 0.2108        | 0.0506        |
| BLYP          | 0.2540         | 0.1920         | 0.4460         | 0.2085        | 0.0503        |
| B3LYP         | 0.2900         | 0.1650         | 0.4550         | 0.2296        | 0.0703        |
| PBE0          | 0.2640         | 0.2000         | 0.4640         | 0.2347        | 0.0738        |
| M06L          | 0.2470         | 0.1960         | 0.4430         | 0.2052        | 0.0645        |
| M062X         | 0.3010         | 0.1850         | 0.4860         | 0.2605        | 0.0890        |
| LC-BLYP       | 0.3510         | 0.1290         | 0.4800         | 0.2824        | 0.1039        |
| CAM-B3LYP     | 0.3040         | 0.1700         | 0.4740         | 0.2564        | 0.0854        |
| wB97XD        | 0.2820         | 0.1990         | 0.4810         | 0.2576        | 0.0848        |
| LC-wPBE       | 0.2710         | 0.2130         | 0.4840         | 0.2697        | 0.0898        |

**Table S5** – Calculated ET parameters (diabatic free energies and couplings) for the  $\pi_3$  conformer different methods. (eV)

| <b>Method</b> | <b>Ect-Egs</b> | <b>Ees-Ect</b> | <b>Ees-Egs</b> | <b>Vgs-ct</b> | <b>Vct-es</b> |
|---------------|----------------|----------------|----------------|---------------|---------------|
| CASPT2        | 0.0162         | 0.2799         | 0.2961         | 0.1104        | 0.1178        |
| HF            | 0.1480         | 0.2830         | 0.4310         | 0.1680        | 0.1404        |
| BP86          | -0.0450        | 0.4670         | 0.4220         | 0.1216        | 0.0697        |
| BLYP          | -0.0260        | 0.4420         | 0.4160         | 0.1199        | 0.0698        |
| B3LYP         | 0.0000         | 0.4170         | 0.4170         | 0.1320        | 0.0798        |
| PBE0          | -0.0260        | 0.4500         | 0.4240         | 0.1355        | 0.0812        |
| M06L          | -0.0380        | 0.4420         | 0.4040         | 0.1207        | 0.0651        |
| M062X         | 0.0080         | 0.4330         | 0.4410         | 0.1529        | 0.0919        |
| LC-BLYP       | 0.0480         | 0.3850         | 0.4330         | 0.1712        | 0.1085        |
| CAM-B3LYP     | 0.0080         | 0.4240         | 0.4320         | 0.1502        | 0.0940        |
| wB97XD        | -0.0120        | 0.4510         | 0.4390         | 0.1499        | 0.0945        |
| LC-wPBE       | -0.0220        | 0.4640         | 0.4420         | 0.1639        | 0.0992        |

**Table S6** – Calculated ET parameters (diabatic free energies and couplings) for the  $\pi_4$  conformer different methods. (eV)

| <b>Method</b> | <b>Ect-Egs</b> | <b>Ees-Ect</b> | <b>Ees-Egs</b> | <b>Vgs-ct</b> | <b>Vct-es</b> |
|---------------|----------------|----------------|----------------|---------------|---------------|
| CASPT2        | 0.1908         | 0.2647         | 0.4555         | 0.1407        | 0.0043        |
| HF            | 0.3080         | 0.2620         | 0.5700         | 0.2056        | 0.0016        |
| BP86          | 0.0490         | 0.4340         | 0.4830         | 0.1077        | 0.0352        |
| BLYP          | 0.0690         | 0.4070         | 0.4760         | 0.1059        | 0.0344        |
| B3LYP         | 0.1080         | 0.3850         | 0.4930         | 0.1246        | 0.0331        |
| PBE0          | 0.0850         | 0.4200         | 0.5050         | 0.1292        | 0.0332        |
| M06L          | 0.0560         | 0.4180         | 0.4740         | 0.1147        | 0.0285        |
| M062X         | 0.1170         | 0.4110         | 0.5280         | 0.1470        | 0.0344        |
| LC-BLYP       | 0.1570         | 0.3640         | 0.5210         | 0.1619        | 0.0314        |
| CAM-B3LYP     | 0.1170         | 0.3970         | 0.5140         | 0.1420        | 0.0333        |
| wB97XD        | 0.0960         | 0.4290         | 0.5250         | 0.1424        | 0.0339        |
| LC-wPBE       | 0.0840         | 0.4440         | 0.5280         | 0.1516        | 0.0327        |

**Table S7** – Calculated ET parameters (diabatic free energies and couplings) for the  $\pi_5$  conformer different methods. (eV)

| <b>Method</b> | <b>Ect-Egs</b> | <b>Ees-Ect</b> | <b>Ees-Egs</b> | <b>Vgs-ct</b> | <b>Vct-es</b> |
|---------------|----------------|----------------|----------------|---------------|---------------|
| CASPT2        | 0.1463         | 0.2297         | 0.3760         | 0.2124        | 0.0079        |
| HF            | 0.3560         | 0.2720         | 0.6280         | 0.2787        | 0.0544        |
| BP86          | 0.1020         | 0.4100         | 0.5120         | 0.1835        | 0.0388        |
| BLYP          | 0.1280         | 0.3810         | 0.5090         | 0.1816        | 0.0382        |
| B3LYP         | 0.1610         | 0.3660         | 0.5270         | 0.2033        | 0.0270        |
| PBE0          | 0.1320         | 0.4030         | 0.5350         | 0.2083        | 0.0255        |
| M06L          | 0.1150         | 0.3960         | 0.5110         | 0.1863        | 0.0238        |
| M062X         | 0.1690         | 0.3890         | 0.5580         | 0.2333        | 0.0234        |
| LC-BLYP       | 0.2060         | 0.3500         | 0.5560         | 0.2588        | 0.0172        |
| CAM-B3LYP     | 0.1690         | 0.3800         | 0.5490         | 0.2295        | 0.0236        |
| wB97XD        | 0.1460         | 0.4090         | 0.5550         | 0.2281        | 0.0246        |
| LC-wPBE       | 0.1260         | 0.4290         | 0.5550         | 0.2458        | 0.0247        |



**Table S8** – Calculated ET parameters (diabatic free energies and couplings) for the  $\pi_6$  conformer different methods. (eV)

| <b>Method</b> | <b>Ect-Egs</b> | <b>Ees-Ect</b> | <b>Ees-Egs</b> | <b>Vgs-ct</b> | <b>Vct-es</b> |
|---------------|----------------|----------------|----------------|---------------|---------------|
| CASPT2        | -0.0123        | 0.2439         | 0.2317         | 0.0192        | 0.0448        |
| HF            | 0.1740         | 0.1300         | 0.3040         | 0.0421        | 0.0443        |
| BP86          | -0.0590        | 0.4350         | 0.3760         | 0.0038        | 0.0407        |
| BLYP          | -0.0360        | 0.4090         | 0.3730         | 0.0034        | 0.0384        |
| B3LYP         | -0.0070        | 0.3710         | 0.3640         | 0.0090        | 0.0354        |
| PBE0          | -0.0380        | 0.4060         | 0.3680         | 0.0100        | 0.0362        |
| M06L          | -0.0490        | 0.4010         | 0.3520         | 0.0086        | 0.0401        |
| M062X         | -0.0040        | 0.3840         | 0.3800         | 0.0150        | 0.0352        |
| LC-BLYP       | 0.0380         | 0.3260         | 0.3640         | 0.0191        | 0.0379        |
| CAM-B3LYP     | -0.0010        | 0.3710         | 0.3700         | 0.0138        | 0.0359        |
| wB97XD        | -0.0250        | 0.4030         | 0.3780         | 0.0139        | 0.0363        |
| LC-wPBE       | -0.0400        | 0.4200         | 0.3800         | 0.0149        | 0.0388        |

**Table S9** – Calculated ET parameters (diabatic free energies and couplings) for the T1 conformer different methods. (eV)

| <b>Method</b> | <b>Ect-Egs</b> | <b>Ees-Ect</b> | <b>Ees-Egs</b> | <b>Vgs-ct</b> | <b>Vct-es</b> |
|---------------|----------------|----------------|----------------|---------------|---------------|
| CASPT2        | 0.7216         | -0.3266        | 0.3950         | 0.0757        | 0.0520        |
| HF            | 0.8780         | -0.4000        | 0.4780         | 0.0732        | 0.0472        |
| BP86          | 0.6500         | -0.2000        | 0.4500         | 0.0610        | 0.0177        |
| BLYP          | 0.6560         | -0.2120        | 0.4440         | 0.0611        | 0.0170        |
| B3LYP         | 0.6960         | -0.2490        | 0.4470         | 0.0656        | 0.0220        |
| PBE0          | 0.6920         | -0.2360        | 0.4560         | 0.0662        | 0.0233        |
| M06L          | 0.6300         | -0.1970        | 0.4330         | 0.0562        | 0.0227        |
| M062X         | 0.7200         | -0.2480        | 0.4720         | 0.0730        | 0.0285        |
| LC-BLYP       | 0.7500         | -0.2890        | 0.4610         | 0.0797        | 0.0353        |
| CAM-B3LYP     | 0.7060         | -0.2450        | 0.4610         | 0.0730        | 0.0282        |
| wB97XD        | 0.6850         | -0.2150        | 0.4700         | 0.0729        | 0.0294        |
| LC-wPBE       | 0.6860         | -0.2160        | 0.4700         | 0.0755        | 0.0329        |

**Table S10** – Calculated ET parameters (diabatic free energies and couplings) for the T2 conformer different methods. (eV)

| <b>Method</b> | <b>Ect-Egs</b> | <b>Ees-Ect</b> | <b>Ees-Egs</b> | <b>Vgs-ct</b> | <b>Vct-es</b> |
|---------------|----------------|----------------|----------------|---------------|---------------|
| CASPT2        | 0.5105         | -0.0114        | 0.4991         | 0.1259        | 0.0315        |
| HF            | 0.6080         | -0.0590        | 0.5490         | 0.1561        | 0.0366        |
| BP86          | 0.3260         | 0.1400         | 0.4660         | 0.0932        | 0.0053        |
| BLYP          | 0.3400         | 0.1210         | 0.4610         | 0.0922        | 0.0049        |
| B3LYP         | 0.3850         | 0.0880         | 0.4730         | 0.1057        | 0.0003        |
| PBE0          | 0.3720         | 0.1100         | 0.4820         | 0.1089        | 0.0001        |
| M06L          | 0.3110         | 0.1410         | 0.4520         | 0.0950        | 0.0003        |
| M062X         | 0.4020         | 0.1000         | 0.5020         | 0.1240        | 0.0012        |
| LC-BLYP       | 0.4440         | 0.0570         | 0.5010         | 0.1362        | 0.0057        |
| CAM-B3LYP     | 0.3970         | 0.0960         | 0.4930         | 0.1204        | 0.0026        |
| wB97XD        | 0.3720         | 0.1290         | 0.5010         | 0.1205        | 0.0031        |
| LC-wPBE       | 0.3680         | 0.1380         | 0.5060         | 0.1283        | 0.0023        |

**Table S11** – Calculated ET parameters (diabatic free energies and couplings) for the T3 conformer different methods. (eV)

| <b>Method</b> | <b>Ect-Egs</b> | <b>Ees-Ect</b> | <b>Ees-Egs</b> | <b>Vgs-ct</b> | <b>Vct-es</b> |
|---------------|----------------|----------------|----------------|---------------|---------------|
| CASPT2        | 0.7441         | -0.3167        | 0.4274         | 0.0197        | 0.0195        |
| HF            | 0.8980         | -0.3970        | 0.5010         | 0.0180        | 0.0164        |
| BP86          | 0.6010         | -0.1350        | 0.4660         | 0.0159        | 0.0081        |
| BLYP          | 0.6080         | -0.1480        | 0.4600         | 0.0160        | 0.0083        |
| B3LYP         | 0.6590         | -0.1940        | 0.4650         | 0.0170        | 0.0097        |
| PBE0          | 0.6550         | -0.1820        | 0.4730         | 0.0170        | 0.0097        |
| M06L          | 0.5800         | -0.1310        | 0.4490         | 0.0131        | 0.0074        |
| M062X         | 0.6880         | -0.1970        | 0.4910         | 0.0183        | 0.0110        |
| LC-BLYP       | 0.7310         | -0.2490        | 0.4820         | 0.0193        | 0.0132        |
| CAM-B3LYP     | 0.6770         | -0.1970        | 0.4800         | 0.0183        | 0.0115        |
| wB97XD        | 0.6540         | -0.1650        | 0.4890         | 0.0178        | 0.0113        |
| LC-wPBE       | 0.6560         | -0.1660        | 0.4900         | 0.0178        | 0.0117        |

Cartesian coordinates (in Å) for  $\pi$ -stacked and T-shape guanine-indole pairs.

Complex  $\pi$ 1

|   |              |              |              |
|---|--------------|--------------|--------------|
| 7 | 0.266800000  | -2.636000000 | -0.004000000 |
| 6 | 1.634300000  | -2.773600000 | 0.002000000  |
| 1 | 2.112000000  | -3.744900000 | -0.001000000 |
| 7 | 2.269100000  | -1.611800000 | 0.016000000  |
| 6 | 1.253000000  | -0.681900000 | 0.018000000  |
| 6 | 1.326800000  | 0.758300000  | 0.009000000  |
| 8 | 2.290900000  | 1.513900000  | -0.003000000 |
| 7 | 0.000000000  | 1.291900000  | 0.000000000  |
| 1 | -0.028600000 | 2.304100000  | -0.098000000 |
| 6 | -1.175600000 | 0.583300000  | 0.006000000  |
| 7 | -2.337700000 | 1.335400000  | -0.074000000 |
| 1 | -2.354500000 | 2.168000000  | 0.506000000  |
| 1 | -3.155800000 | 0.753000000  | 0.073000000  |
| 7 | -1.242900000 | -0.725600000 | 0.015000000  |
| 6 | 0.000000000  | -1.291900000 | 0.000000000  |
| 1 | -0.429900000 | -3.371900000 | -0.018000000 |
| 6 | 0.365400000  | -2.784100000 | 3.380000000  |
| 6 | 1.739800000  | -2.838300000 | 3.380000000  |
| 6 | 0.000000000  | -1.401500000 | 3.380000000  |
| 1 | 2.405500000  | -3.692000000 | 3.380000000  |
| 7 | 2.246500000  | -1.555100000 | 3.380000000  |
| 6 | 1.208600000  | -0.650200000 | 3.380000000  |
| 6 | -1.226100000 | -0.708800000 | 3.380000000  |
| 1 | 3.229300000  | -1.317400000 | 3.383000000  |
| 6 | 1.226800000  | 0.750700000  | 3.380000000  |
| 6 | -1.213700000 | 0.678700000  | 3.380000000  |
| 1 | -2.167700000 | -1.254700000 | 3.380000000  |
| 1 | 2.160900000  | 1.309100000  | 3.380000000  |
| 6 | 0.000000000  | 1.401500000  | 3.380000000  |
| 1 | -2.154200000 | 1.224500000  | 3.380000000  |
| 1 | -0.027000000 | 2.488600000  | 3.380000000  |
| 1 | -0.301100000 | -3.637000000 | 3.380000000  |

## Complex $\pi_2$

|   |              |              |              |
|---|--------------|--------------|--------------|
| 7 | 0.266800000  | -2.636000000 | -0.004000000 |
| 6 | 1.634300000  | -2.773600000 | 0.002000000  |
| 1 | 2.112000000  | -3.744900000 | -0.001000000 |
| 7 | 2.269100000  | -1.611800000 | 0.016000000  |
| 6 | 1.253000000  | -0.681900000 | 0.018000000  |
| 6 | 1.326800000  | 0.758300000  | 0.009000000  |
| 8 | 2.290900000  | 1.513900000  | -0.003000000 |
| 7 | 0.000000000  | 1.291900000  | 0.000000000  |
| 1 | -0.028600000 | 2.304100000  | -0.098000000 |
| 6 | -1.175600000 | 0.583300000  | 0.006000000  |
| 7 | -2.337700000 | 1.335400000  | -0.074000000 |
| 1 | -2.354500000 | 2.168000000  | 0.506000000  |
| 1 | -3.155800000 | 0.753000000  | 0.073000000  |
| 7 | -1.242900000 | -0.725600000 | 0.015000000  |
| 6 | 0.000000000  | -1.291900000 | 0.000000000  |
| 1 | -0.429900000 | -3.371900000 | -0.018000000 |
| 6 | 2.365400000  | -2.784100000 | 3.380000000  |
| 6 | 3.739800000  | -2.838300000 | 3.380000000  |
| 6 | 2.000000000  | -1.401500000 | 3.380000000  |
| 1 | 4.405500000  | -3.692000000 | 3.380000000  |
| 7 | 4.246500000  | -1.555100000 | 3.380000000  |
| 6 | 3.208600000  | -0.650200000 | 3.380000000  |
| 6 | 0.773900000  | -0.708800000 | 3.380000000  |
| 1 | 5.229300000  | -1.317400000 | 3.383000000  |
| 6 | 3.226800000  | 0.750700000  | 3.380000000  |
| 6 | 0.786300000  | 0.678700000  | 3.380000000  |
| 1 | -0.167700000 | -1.254700000 | 3.380000000  |
| 1 | 4.160900000  | 1.309100000  | 3.380000000  |
| 6 | 2.000000000  | 1.401500000  | 3.380000000  |
| 1 | -0.154200000 | 1.224500000  | 3.380000000  |
| 1 | 1.973000000  | 2.488600000  | 3.380000000  |
| 1 | 1.698900000  | -3.637000000 | 3.380000000  |

### Complex $\pi_3$

|   |              |              |              |
|---|--------------|--------------|--------------|
| 7 | 0.266800000  | -2.636000000 | -0.004000000 |
| 6 | 1.634300000  | -2.773600000 | 0.002000000  |
| 1 | 2.112000000  | -3.744900000 | -0.001000000 |
| 7 | 2.269100000  | -1.611800000 | 0.016000000  |
| 6 | 1.253000000  | -0.681900000 | 0.018000000  |
| 6 | 1.326800000  | 0.758300000  | 0.009000000  |
| 8 | 2.290900000  | 1.513900000  | -0.003000000 |
| 7 | 0.000000000  | 1.291900000  | 0.000000000  |
| 1 | -0.028600000 | 2.304100000  | -0.098000000 |
| 6 | -1.175600000 | 0.583300000  | 0.006000000  |
| 7 | -2.337700000 | 1.335400000  | -0.074000000 |
| 1 | -2.354500000 | 2.168000000  | 0.506000000  |
| 1 | -3.155800000 | 0.753000000  | 0.073000000  |
| 7 | -1.242900000 | -0.725600000 | 0.015000000  |
| 6 | 0.000000000  | -1.291900000 | 0.000000000  |
| 1 | -0.429900000 | -3.371900000 | -0.018000000 |
| 6 | 0.365400000  | -4.484100000 | 3.380000000  |
| 6 | 1.739800000  | -4.538300000 | 3.380000000  |
| 6 | 0.000000000  | -3.101500000 | 3.380000000  |
| 1 | 2.405500000  | -5.392000000 | 3.380000000  |
| 7 | 2.246500000  | -3.255100000 | 3.380000000  |
| 6 | 1.208600000  | -2.350200000 | 3.380000000  |
| 6 | -1.226100000 | -2.408800000 | 3.380000000  |
| 1 | 3.229300000  | -3.017400000 | 3.383000000  |
| 6 | 1.226800000  | -0.949300000 | 3.380000000  |
| 6 | -1.213700000 | -1.021300000 | 3.380000000  |
| 1 | -2.167700000 | -2.954700000 | 3.380000000  |
| 1 | 2.160900000  | -0.390900000 | 3.380000000  |
| 6 | 0.000000000  | -0.298500000 | 3.380000000  |
| 1 | -2.154200000 | -0.475500000 | 3.380000000  |
| 1 | -0.027000000 | 0.788600000  | 3.380000000  |
| 1 | -0.301100000 | -5.337000000 | 3.380000000  |

## Complex $\pi_4$

|   |              |              |              |
|---|--------------|--------------|--------------|
| 7 | 0.266800000  | -2.636000000 | -0.004000000 |
| 6 | 1.634300000  | -2.773600000 | 0.002000000  |
| 1 | 2.112000000  | -3.744900000 | -0.001000000 |
| 7 | 2.269100000  | -1.611800000 | 0.016000000  |
| 6 | 1.253000000  | -0.681900000 | 0.018000000  |
| 6 | 1.326800000  | 0.758300000  | 0.009000000  |
| 8 | 2.290900000  | 1.513900000  | -0.003000000 |
| 7 | 0.000000000  | 1.291900000  | 0.000000000  |
| 1 | -0.028600000 | 2.304100000  | -0.098000000 |
| 6 | -1.175600000 | 0.583300000  | 0.006000000  |
| 7 | -2.337700000 | 1.335400000  | -0.074000000 |
| 1 | -2.354500000 | 2.168000000  | 0.506000000  |
| 1 | -3.155800000 | 0.753000000  | 0.073000000  |
| 7 | -1.242900000 | -0.725600000 | 0.015000000  |
| 6 | 0.000000000  | -1.291900000 | 0.000000000  |
| 1 | -0.429900000 | -3.371900000 | -0.018000000 |
| 6 | 0.365400000  | -0.084100000 | 3.380000000  |
| 6 | 1.739800000  | -0.138300000 | 3.380000000  |
| 6 | 0.000000000  | 1.298500000  | 3.380000000  |
| 1 | 2.405500000  | -0.992000000 | 3.380000000  |
| 7 | 2.246500000  | 1.144900000  | 3.380000000  |
| 6 | 1.208600000  | 2.049800000  | 3.380000000  |
| 6 | -1.226100000 | 1.991200000  | 3.380000000  |
| 1 | 3.229300000  | 1.382600000  | 3.383000000  |
| 6 | 1.226800000  | 3.450700000  | 3.380000000  |
| 6 | -1.213700000 | 3.378700000  | 3.380000000  |
| 1 | -2.167700000 | 1.445300000  | 3.380000000  |
| 1 | 2.160900000  | 4.009100000  | 3.380000000  |
| 6 | 0.000000000  | 4.101500000  | 3.380000000  |
| 1 | -2.154200000 | 3.924500000  | 3.380000000  |
| 1 | -0.027000000 | 5.188600000  | 3.380000000  |
| 1 | -0.301100000 | -0.937000000 | 3.380000000  |



## Complex $\pi_5$

|   |              |              |              |
|---|--------------|--------------|--------------|
| 7 | 0.266800000  | -2.636000000 | -0.004000000 |
| 6 | 1.634300000  | -2.773600000 | 0.002000000  |
| 1 | 2.112000000  | -3.744900000 | -0.001000000 |
| 7 | 2.269100000  | -1.611800000 | 0.016000000  |
| 6 | 1.253000000  | -0.681900000 | 0.018000000  |
| 6 | 1.326800000  | 0.758300000  | 0.009000000  |
| 8 | 2.290900000  | 1.513900000  | -0.003000000 |
| 7 | 0.000000000  | 1.291900000  | 0.000000000  |
| 1 | -0.028600000 | 2.304100000  | -0.098000000 |
| 6 | -1.175600000 | 0.583300000  | 0.006000000  |
| 7 | -2.337700000 | 1.335400000  | -0.074000000 |
| 1 | -2.354500000 | 2.168000000  | 0.506000000  |
| 1 | -3.155800000 | 0.753000000  | 0.073000000  |
| 7 | -1.242900000 | -0.725600000 | 0.015000000  |
| 6 | 0.000000000  | -1.291900000 | 0.000000000  |
| 1 | -0.429900000 | -3.371900000 | -0.018000000 |
| 6 | 2.491200000  | 1.295600000  | 3.380000000  |
| 6 | 2.072100000  | 2.605600000  | 3.380000000  |
| 6 | 1.317000000  | 0.479300000  | 3.380000000  |
| 1 | 2.646600000  | 3.523200000  | 3.380000000  |
| 7 | 0.693000000  | 2.642900000  | 3.380000000  |
| 6 | 0.197600000  | 1.358100000  | 3.380000000  |
| 6 | 1.085400000  | -0.909700000 | 3.380000000  |
| 1 | 0.133500000  | 3.485100000  | 3.383000000  |
| 6 | -1.125000000 | 0.896100000  | 3.380000000  |
| 6 | -0.222700000 | -1.372600000 | 3.380000000  |
| 1 | 1.920400000  | -1.607800000 | 3.380000000  |
| 1 | -1.969200000 | 1.582800000  | 3.380000000  |
| 6 | -1.317000000 | -0.479300000 | 3.380000000  |
| 1 | -0.413900000 | -2.443100000 | 3.380000000  |
| 1 | -2.329300000 | -0.876500000 | 3.380000000  |
| 1 | 3.520600000  | 0.961000000  | 3.380000000  |

## Complex $\pi_6$

|   |              |              |              |
|---|--------------|--------------|--------------|
| 7 | 0.266800000  | -2.636000000 | -0.004000000 |
| 6 | 1.634300000  | -2.773600000 | 0.002000000  |
| 1 | 2.112000000  | -3.744900000 | -0.001000000 |
| 7 | 2.269100000  | -1.611800000 | 0.016000000  |
| 6 | 1.253000000  | -0.681900000 | 0.018000000  |
| 6 | 1.326800000  | 0.758300000  | 0.009000000  |
| 8 | 2.290900000  | 1.513900000  | -0.003000000 |
| 7 | 0.000000000  | 1.291900000  | 0.000000000  |
| 1 | -0.028600000 | 2.304100000  | -0.098000000 |
| 6 | -1.175600000 | 0.583300000  | 0.006000000  |
| 7 | -2.337700000 | 1.335400000  | -0.074000000 |
| 1 | -2.354500000 | 2.168000000  | 0.506000000  |
| 1 | -3.155800000 | 0.753000000  | 0.073000000  |
| 7 | -1.242900000 | -0.725600000 | 0.015000000  |
| 6 | 0.000000000  | -1.291900000 | 0.000000000  |
| 1 | -0.429900000 | -3.371900000 | -0.018000000 |
| 6 | -1.865300000 | 2.262000000  | -3.190900000 |
| 6 | -1.014500000 | 3.312200000  | -2.935400000 |
| 6 | -1.058300000 | 1.087300000  | -3.308800000 |
| 1 | -1.227300000 | 4.362400000  | -2.781400000 |
| 7 | 0.283200000  | 2.846400000  | -2.888800000 |
| 6 | 0.293200000  | 1.487800000  | -3.113300000 |
| 6 | -1.330800000 | -0.271200000 | -3.560200000 |
| 1 | 1.100700000  | 3.416800000  | -2.719200000 |
| 6 | 1.362900000  | 0.584300000  | -3.161200000 |
| 6 | -0.274900000 | -1.170300000 | -3.608700000 |
| 1 | -2.353900000 | -0.609100000 | -3.714000000 |
| 1 | 2.390600000  | 0.908500000  | -3.009300000 |
| 6 | 1.058300000  | -0.747300000 | -3.411200000 |
| 1 | -0.473000000 | -2.221800000 | -3.802100000 |
| 1 | 1.861800000  | -1.478800000 | -3.455900000 |
| 1 | -2.941800000 | 2.328200000  | -3.282600000 |

## Complex T1

|   |              |              |              |
|---|--------------|--------------|--------------|
| 7 | 0.266800000  | -2.636000000 | -0.004000000 |
| 6 | 1.634300000  | -2.773600000 | 0.002000000  |
| 1 | 2.112000000  | -3.744900000 | -0.001000000 |
| 7 | 2.269100000  | -1.611800000 | 0.016000000  |
| 6 | 1.253000000  | -0.681900000 | 0.018000000  |
| 6 | 1.326800000  | 0.758300000  | 0.009000000  |
| 8 | 2.290900000  | 1.513900000  | -0.003000000 |
| 7 | 0.000000000  | 1.291900000  | 0.000000000  |
| 1 | -0.028600000 | 2.304100000  | -0.098000000 |
| 6 | -1.175600000 | 0.583300000  | 0.006000000  |
| 7 | -2.337700000 | 1.335400000  | -0.074000000 |
| 1 | -2.354500000 | 2.168000000  | 0.506000000  |
| 1 | -3.155800000 | 0.753000000  | 0.073000000  |
| 7 | -1.242900000 | -0.725600000 | 0.015000000  |
| 6 | 0.000000000  | -1.291900000 | 0.000000000  |
| 1 | -0.429900000 | -3.371900000 | -0.018000000 |
| 6 | -0.063500000 | -2.784100000 | 5.020100000  |
| 6 | -0.302100000 | -2.838300000 | 3.666600000  |
| 6 | 0.000000000  | -1.401500000 | 5.380000000  |
| 1 | -0.417700000 | -3.692000000 | 3.011000000  |
| 7 | -0.390100000 | -1.555100000 | 3.167600000  |
| 6 | -0.209900000 | -0.650200000 | 4.189800000  |
| 6 | 0.212900000  | -0.708800000 | 6.587500000  |
| 1 | -0.557800000 | -1.317400000 | 2.199200000  |
| 6 | -0.213000000 | 0.750700000  | 4.171800000  |
| 6 | 0.210800000  | 0.678700000  | 6.575300000  |
| 1 | 0.376400000  | -1.254700000 | 7.514800000  |
| 1 | -0.375200000 | 1.309100000  | 3.251900000  |
| 6 | 0.000000000  | 1.401500000  | 5.380000000  |
| 1 | 0.374100000  | 1.224500000  | 7.501500000  |
| 1 | 0.004700000  | 2.488600000  | 5.406600000  |
| 1 | 0.052300000  | -3.637000000 | 5.676500000  |

## Complex T2

|   |              |              |              |
|---|--------------|--------------|--------------|
| 7 | 0.266800000  | -2.636000000 | -0.004000000 |
| 6 | 1.634300000  | -2.773600000 | 0.002000000  |
| 1 | 2.112000000  | -3.744900000 | -0.001000000 |
| 7 | 2.269100000  | -1.611800000 | 0.016000000  |
| 6 | 1.253000000  | -0.681900000 | 0.018000000  |
| 6 | 1.326800000  | 0.758300000  | 0.009000000  |
| 8 | 2.290900000  | 1.513900000  | -0.003000000 |
| 7 | 0.000000000  | 1.291900000  | 0.000000000  |
| 1 | -0.028600000 | 2.304100000  | -0.098000000 |
| 6 | -1.175600000 | 0.583300000  | 0.006000000  |
| 7 | -2.337700000 | 1.335400000  | -0.074000000 |
| 1 | -2.354500000 | 2.168000000  | 0.506000000  |
| 1 | -3.155800000 | 0.753000000  | 0.073000000  |
| 7 | -1.242900000 | -0.725600000 | 0.015000000  |
| 6 | 0.000000000  | -1.291900000 | 0.000000000  |
| 1 | -0.429900000 | -3.371900000 | -0.018000000 |
| 6 | 0.365400000  | -1.789600000 | 3.247300000  |
| 6 | 1.739800000  | -1.824400000 | 3.205700000  |
| 6 | 0.000000000  | -0.900900000 | 4.306400000  |
| 1 | 2.405500000  | -2.373200000 | 2.551800000  |
| 7 | 2.246500000  | -0.999600000 | 4.188700000  |
| 6 | 1.208600000  | -0.417900000 | 4.881900000  |
| 6 | -1.226100000 | -0.455600000 | 4.837000000  |
| 1 | 3.229300000  | -0.849100000 | 4.372700000  |
| 6 | 1.226800000  | 0.482500000  | 5.955100000  |
| 6 | -1.213700000 | 0.436300000  | 5.899900000  |
| 1 | -2.167700000 | -0.806500000 | 4.418800000  |
| 1 | 2.160900000  | 0.841500000  | 6.382800000  |
| 6 | 0.000000000  | 0.900900000  | 6.453600000  |
| 1 | -2.154200000 | 0.787100000  | 6.318000000  |
| 1 | -0.027000000 | 1.599600000  | 7.286400000  |
| 1 | -0.301100000 | -2.337800000 | 2.593900000  |

### Complex T3

|   |              |              |              |
|---|--------------|--------------|--------------|
| 7 | -1.722530000 | 2.459270000  | 1.191890000  |
| 6 | -0.878800000 | 2.459270000  | 2.278330000  |
| 7 | 0.399690000  | 2.459270000  | 1.937070000  |
| 6 | 0.371980000  | 2.459270000  | 0.558950000  |
| 6 | 1.462800000  | 2.459270000  | -0.381050000 |
| 8 | 2.676320000  | 2.459270000  | -0.210300000 |
| 7 | 0.935190000  | 2.459270000  | -1.711400000 |
| 6 | -0.390570000 | 2.459270000  | -2.074980000 |
| 7 | -0.663430000 | 2.459270000  | -3.410970000 |
| 7 | -1.384710000 | 2.459270000  | -1.216110000 |
| 6 | -0.933930000 | 2.459270000  | 0.071220000  |
| 1 | -1.253680000 | 2.459270000  | 3.293650000  |
| 1 | 1.661260000  | 2.459270000  | -2.423280000 |
| 1 | 0.052680000  | 2.459270000  | -4.118530000 |
| 1 | -1.632920000 | 2.459270000  | -3.688360000 |
| 1 | -2.735730000 | 2.459270000  | 1.194260000  |
| 1 | 1.709130000  | -1.816390000 | 3.622040000  |
| 1 | 0.771290000  | -0.136580000 | 2.004170000  |
| 1 | -0.306550000 | -5.087480000 | 0.144800000  |
| 1 | -0.650410000 | -0.103670000 | -0.448390000 |
| 1 | -1.450240000 | -4.114260000 | -1.828170000 |
| 1 | -1.621180000 | -1.663380000 | -2.123060000 |
| 1 | 1.157680000  | -4.289860000 | 2.670740000  |
| 6 | 0.892890000  | -3.345040000 | 2.213940000  |
| 6 | 1.185040000  | -2.099110000 | 2.717920000  |
| 6 | 0.182560000  | -3.146040000 | 0.988570000  |
| 7 | 0.690270000  | -1.134700000 | 1.864420000  |
| 6 | 0.070150000  | -1.740990000 | 0.794640000  |
| 6 | -0.375970000 | -4.007880000 | 0.025040000  |
| 6 | -0.573970000 | -1.181300000 | -0.316520000 |
| 6 | -1.015060000 | -3.458880000 | -1.077450000 |
| 6 | -1.113330000 | -2.059780000 | -1.246960000 |
